# Supplementary material
Source: Springer Nature journal article supplement (https://www.springermedizin.de/resource/supplementary/12986_2006_83_MOESM1_ESM.pdf/25655330)

**A**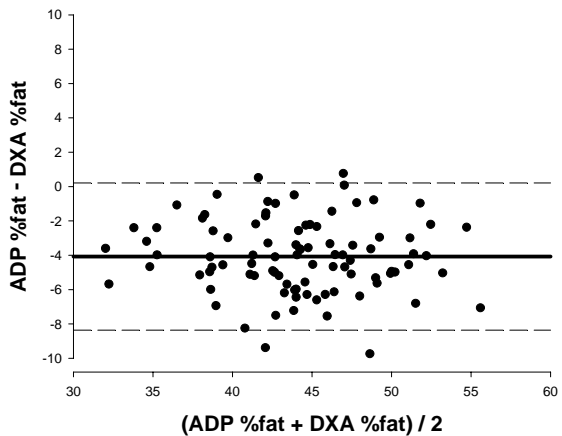**B**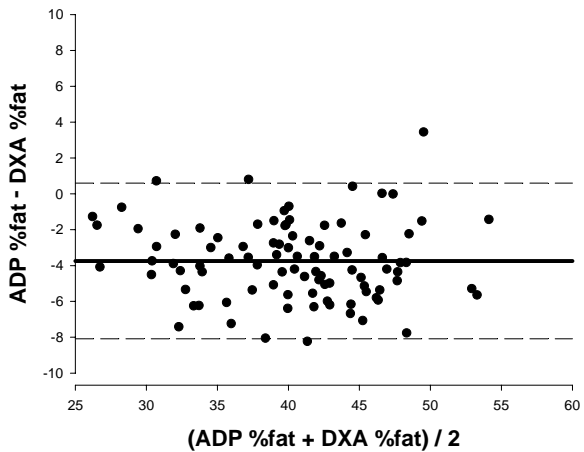**C**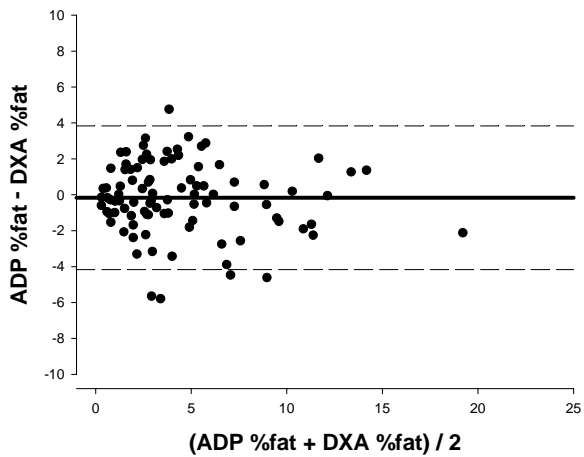

Supplement: MOESM1 [file 25655330]
